# Supplementary material for: Curcumin enhances the anti-cancer efficacy of paclitaxel in ovarian cancer by regulating the miR-9-5p/BRCA1 axis
Source: Frontiers journal article supplement (doi:10.3389/fphar.2022.1014933), 2023-01-10
Supplement: Data_Sheet_1.pdf [file Data_Sheet_1.pdf]

## Supplemental materials

**Table S1** Sequences of siRNAs against specific targets in this study.

| Item             | Sequence          |                       |
|------------------|-------------------|-----------------------|
| BRCA1<br>siRNA#1 | Sense (5'-3')     | GGGAUCUGAUUCUUCUGAATT |
|                  | Antisense (5'-3') | UUCAGAAGAAUCAGAUCCCTT |
| BRCA1<br>siRNA#2 | Sense (5'-3')     | CACCACAUCACUUUAACUATT |
|                  | Antisense (5'-3') | UAGUAAAAGUGAUGUGGUGTT |
| si-NC            | Sense (5'-3')     | UUCUCCGAACGUGUCACGUTT |
|                  | Antisense (5'-3') | ACGUGACACGUUCGGAGAATT |

**Table S2** Sequences of primers used for qRT-PCR in this study.

| Item     | Sequence        |                                        |
|----------|-----------------|----------------------------------------|
| BRCA1    | Forward (5'-3') | ACCTTGGAAGTGTGAGAACTCT                 |
|          | Reverse (5'-3') | TCTTGATCTCCCACTGCAATA                  |
| miR-9-5p | Forward (5'-3') | Designed by RiboBio (Guangzhou, China) |
|          | RT (5'-3')      | Designed by RiboBio (Guangzhou, China) |
| GAPDH    | Forward (5'-3') | TCACCACCATGGAGAAGGC                    |
|          | Reverse (5'-3') | GCTAAGCAGTTGGTGGTGCA                   |
| U6       | Forward (5'-3') | CTCGCTTCGGCAGCACA                      |
|          | RT (5'-3')      | AACGCTTCACGAATTTGCGT                   |

**Table S3** Antibodies used in this study.

| Antigens | Manufacturer    | Application   |
|----------|-----------------|---------------|
| BRCA1    | Santa Cruz, USA | 1:200 for WB  |
| Bax      | Abcam, USA      | 1:1000 for WB |
| Bcl-2    | Santa Cruz, USA | 1:200 for WB  |
| GAPDH    | Diagbio, China  | 1:1000 for WB |

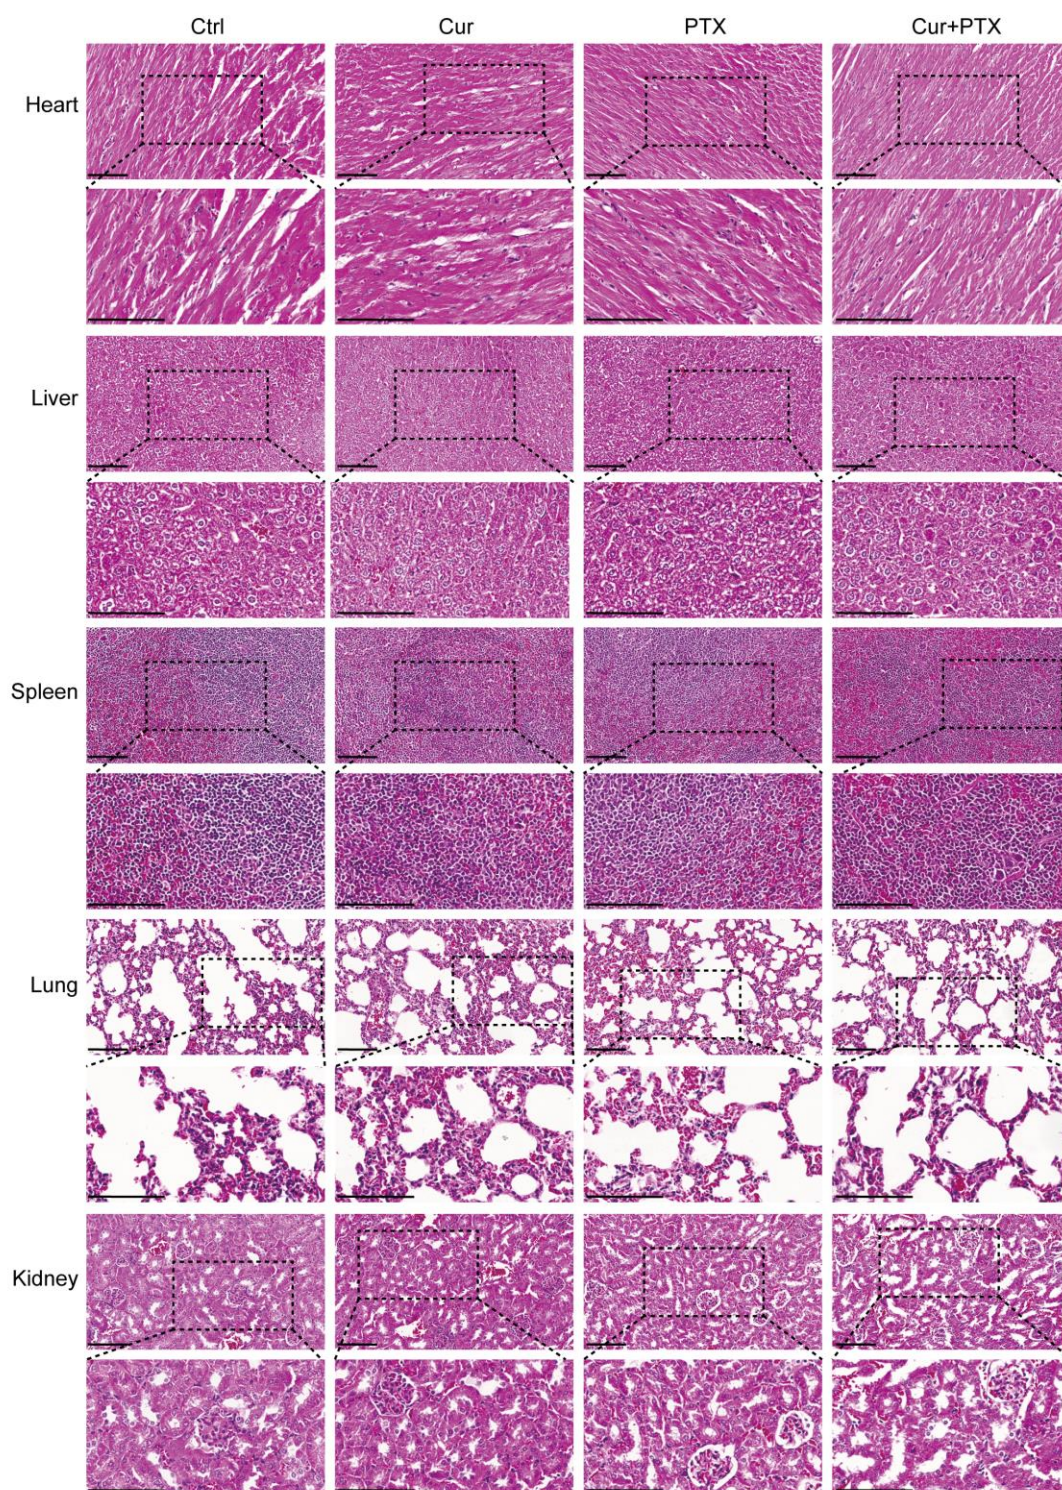

**Figure S1. related to Figure 2.**

H&E staining images of major organs (heart, liver, spleen, lung and kidney) from mice after different treatments (Scale bar = 100  $\mu$ m).

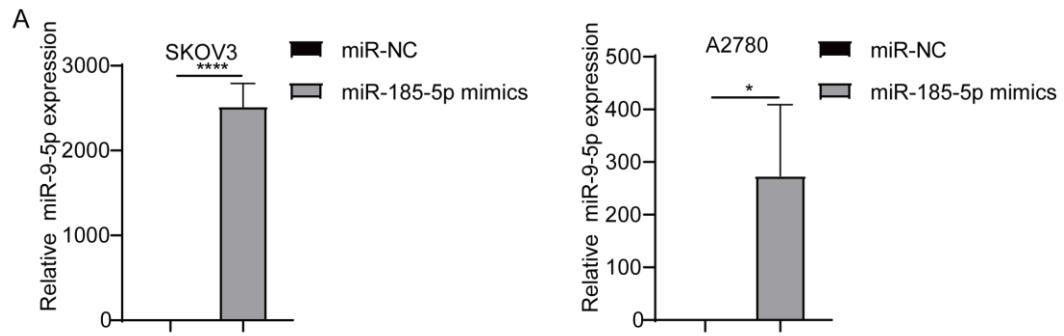

**Figure S2. related to Figure 3.**

The relative expression levels of miR-9-5p were detected by qRT-PCR in SKOV3 and A2780 cells transfected with miR-9-5p mimics or miR-NC.



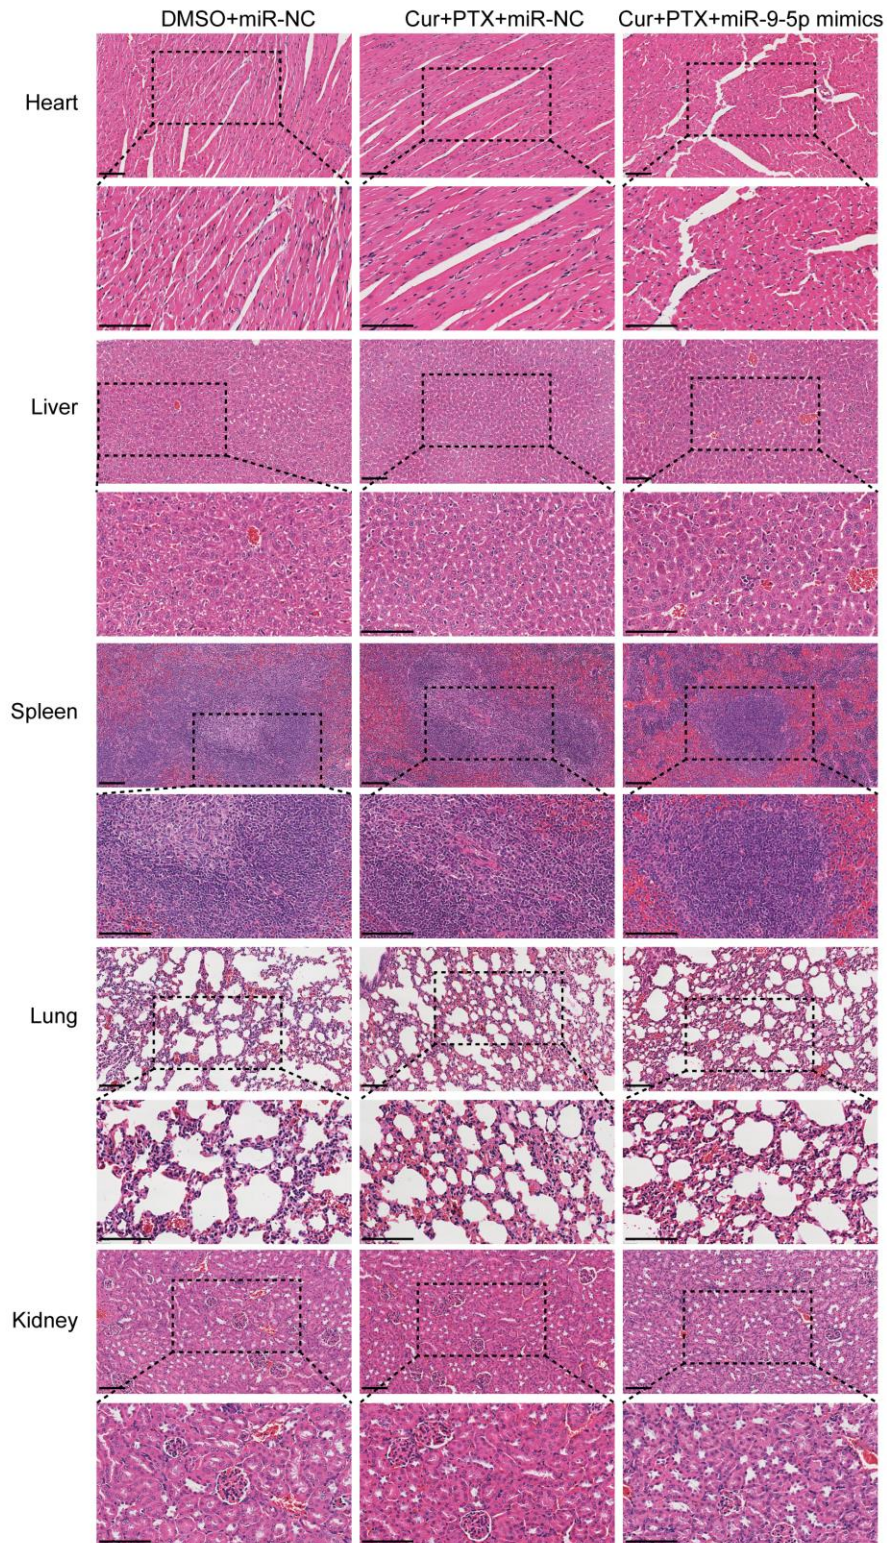

**Figure S3. related to Figure 4.**

H&E staining images of major organs (heart, liver, spleen, lung and kidney) from mice after different treatments (Scale bar = 100  $\mu$ m).

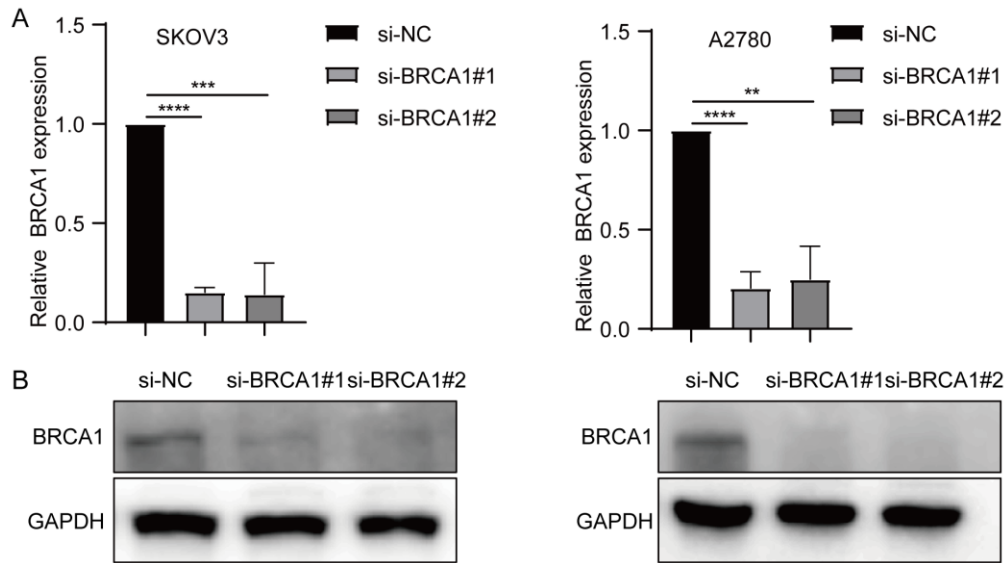

**Figure S4. related to Figure 5.**

**A-B** The relative levels of BRCA1 mRNA (**A**) and protein (**B**) expression in SKOV3 and A2780 cells transfected with si-BRCA1#1, si-BRCA1#2 or si-NC were detected by qRT-PCR and Western blotting, respectively.

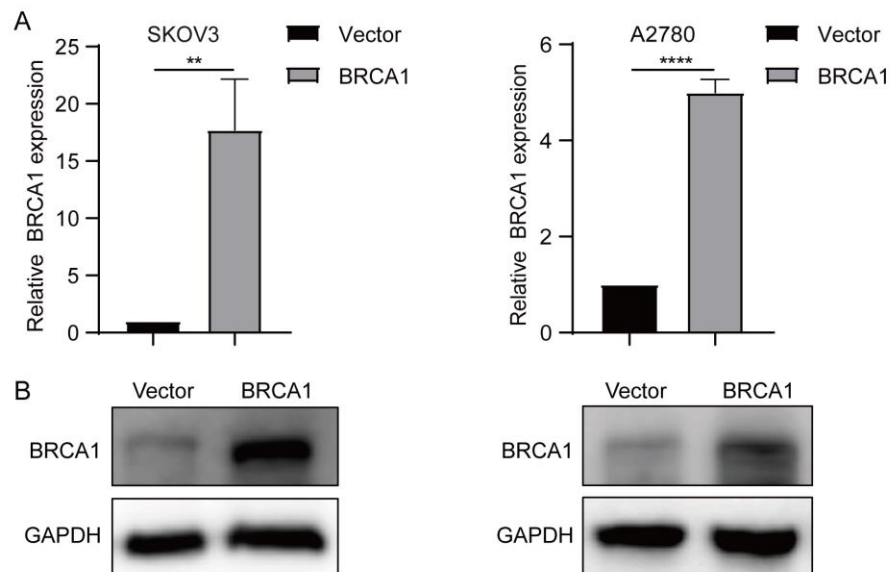

**Figure S5. related to Figure 6.**

**A-B** The relative levels of BRCA1 mRNA (**A**) and protein (**B**) expression in SKOV3 and A2780 cells transfected with BRCA1 plasmids or vector were detected by qRT-PCR and Western blotting, respectively.

Data are representative of at least three independent experiments and presented as the mean  $\pm$  SD. \*p < 0.05, \*\*p < 0.01, \*\*\*p < 0.001, \*\*\*\*p < 0.0001.
